# Supplementary material
Source: Research Square preprint supplement (doi:10.21203/rs.3.rs-9123269/v1)
Supplement: Supplementary file 1 [file 7fe731aa8fdb62e669b02ece.pdf]

## Supporting Information

### *Single-step fabrication of a large-scale broadband sunlight absorber based on multiple directional grating structures*

*Tien Thanh Pham<sup>1\*,//</sup>, Quang Huy Nguyen<sup>2,//</sup>, Thi Viet Ha Tran<sup>1</sup>, Daisuke Tanaka<sup>3</sup>, Minh Hiep Ha<sup>4</sup>*

<sup>1</sup> VNU Vietnam Japan University (VJU), Vietnam National University, Hanoi (VNU), Luu Huu Phuoc Street, Tu Liem Ward, Hanoi 12016, Vietnam

<sup>2</sup> Department of Electrical and Electronic Engineering, School of Engineering, Institute of Science Tokyo, Nagatsuta, Midori-ku, Yokohama 226-8502, Japan

<sup>3</sup> Department of Electric and Electronic Engineering, National Institute of Technology, Oita College, 1666 Maki, Oita, 870-0152, Japan

<sup>4</sup> Directorate for Standards, Metrology and Quality (STAMEQ), Ministry of Science and Technology, Hoang Quoc Viet, Cau Giay, Hanoi 100000, Viet Nam Vietnam Japan University (VJU), Vietnam National University, Hanoi (VNU), Luu Huu Phuoc Street, Nam Tu Liem District, Hanoi 100000, Vietnam.

\* *Email: [pt.thanh@vju.ac.vn](mailto:pt.thanh@vju.ac.vn) (Tien Thanh Pham)*

Keywords: Biomaterials; Broadband absorbers; Grating structure; Multidirectional grating structure; Photothermal materials; Nanostructures.

**S1. Natural *Catharanthus roseus* and mulberry leaves**

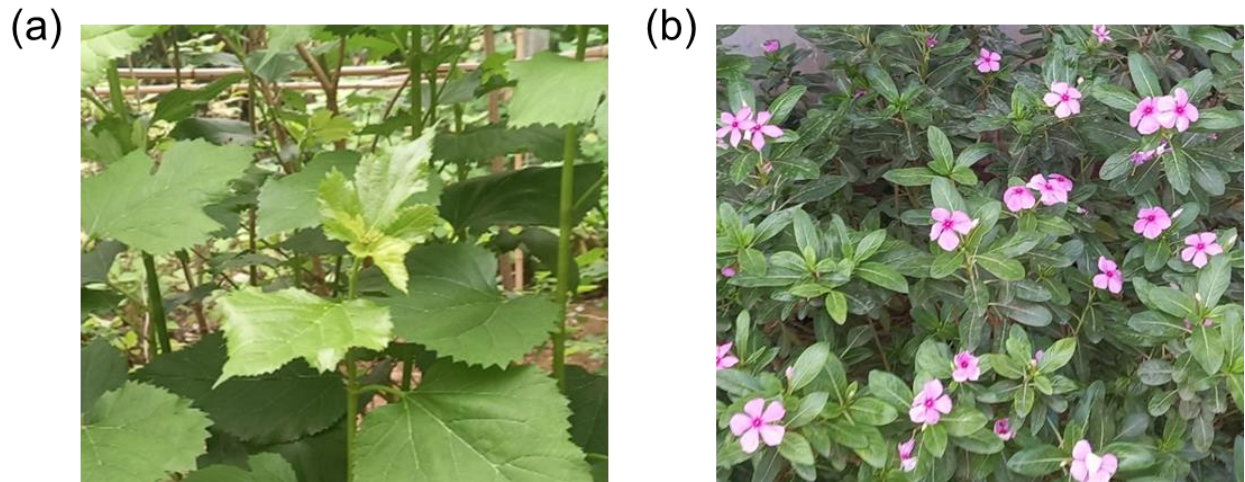

**Figure S1.** Photographs of (a) *mulberry* (CR) leaf and (b) *Catharanthus roseus* leaf.

**S2. Contact angle of the surface leaves**

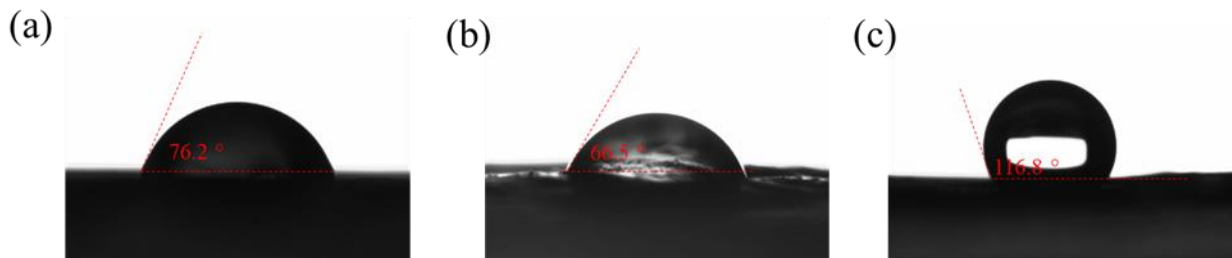

**Figure S2.** (a) The contact angle of the CR and *mulberry* leaf were 76.2° and 66.5°, respectively, which exhibited the hydrophilic property in the CR and *mulberry* leaf surface. (b) The contact angle of the 10-nm-Au-coated *mulberry* leaf with a 50 nm was 116.8°, exhibiting the hydrophobic property after coating the Au layer onto the surface.

### S3. The condition of the Au-coated leaf at 1 day, 6 days, and 14 days after fabrication

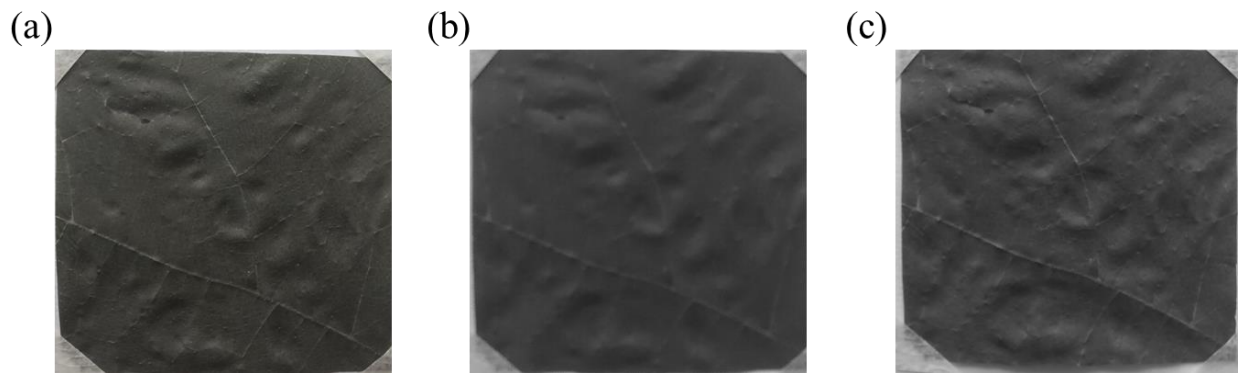

**Figure S3.** Photograph of the leaf sputtered by 18 nm-thick-Au layer (a) 1 day, (b) 6 days, and (c) 14 days after fabrication under room temperature condition.

### S4. Reflection spectra of 23-nm-Au thin film and Au-coated *mulberry* leaf

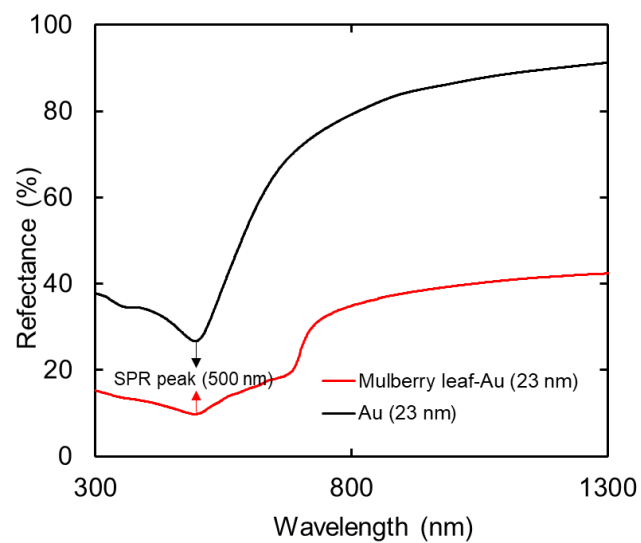

**Figure S4.** Reflection spectra of 23-nm-Au thin film and Au-coated *mulberry* leaf.

### S5. Transmission and scattering reflection spectra of the CR leaf and Au-coated CR leaf

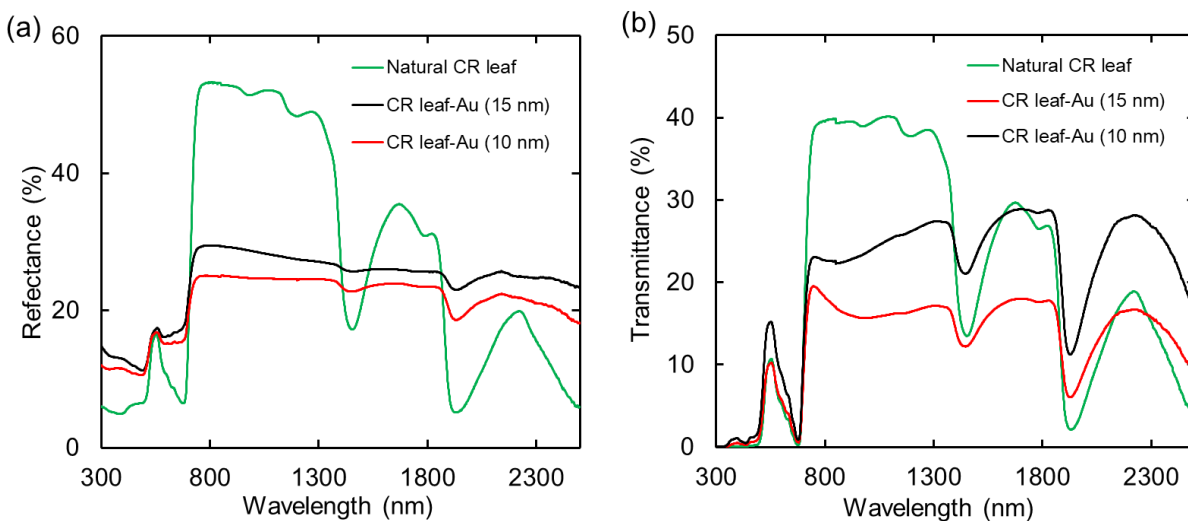

**Figure S5.** (a) Scattering reflection spectra of RC leaf, 10 and 15-nm-Au coated leaf, and (b) transmission of RC leaf, 10 and 15-nm-Au coated leaf.

### S6. The light absorption spectra after 1 month fabrication

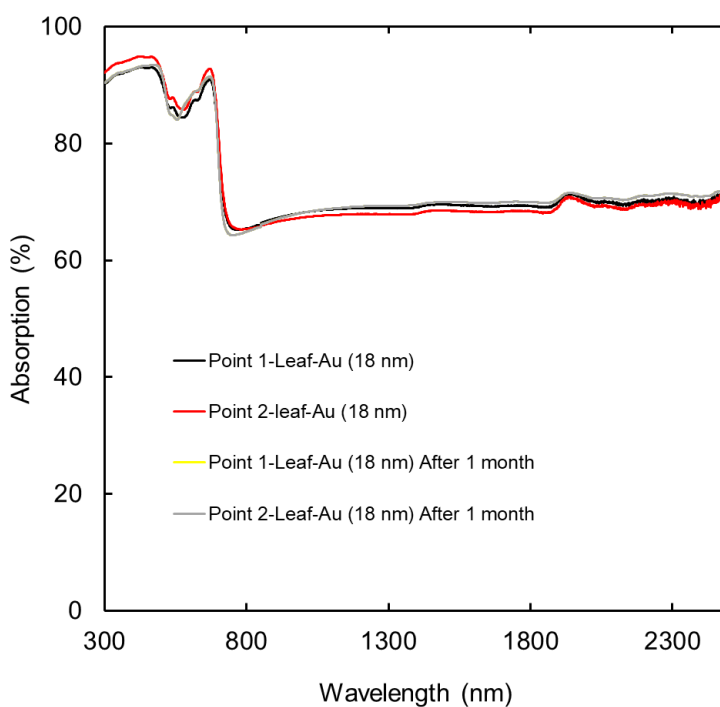

**Figure S6:** The light absorption spectra of 18 nm Au-coated *mulberry* leaves were measured at different locations on the sample immediately after fabrication and 1 month.

### S7. Calculated absorption spectra

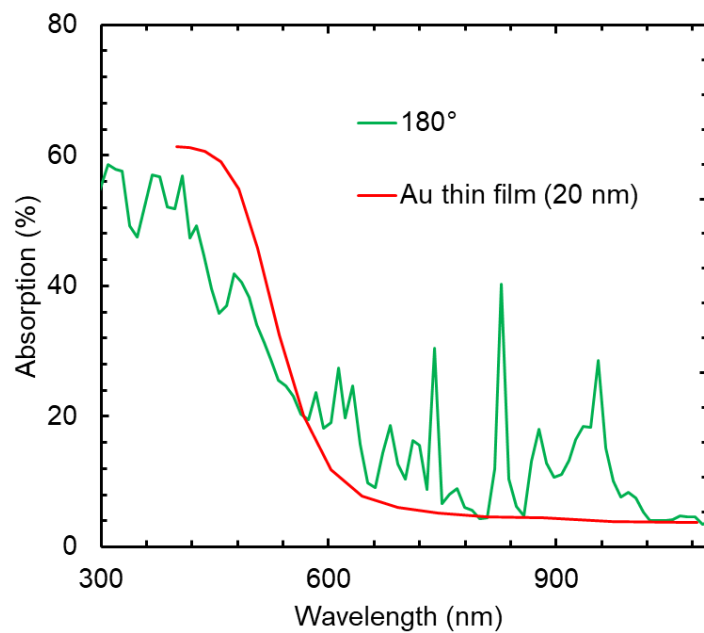

**Figure S7.** Calculated absorption spectra of the grating structure with uniaxial ( $\alpha=180^\circ$ ) (blue line), 20 nm-Au thin film (red line).
